# Supplementary material for: Dimethylsulfide gas transfer coefficients from algal blooms in the Southern Ocean
Source: Copernicus journal article supplement (doi:10.5194/acp-15-1783-2015), 2015-02-19
Supplement: Supplementary file 1 [file acp-15-1783-2015-supplement.pdf]

Supplement of Atmos. Chem. Phys., 15, 1783–1794, 2015  
<http://www.atmos-chem-phys.net/15/1783/2015/>  
doi:10.5194/acp-15-1783-2015-supplement  
© Author(s) 2015. CC Attribution 3.0 License.

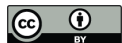

*Supplement of*

## **Dimethylsulfide gas transfer coefficients from algal blooms in the Southern Ocean**

**T. G. Bell et al.**

*Correspondence to:* T. G. Bell (tbe@pml.ac.uk)

1 **Supplemental Material**

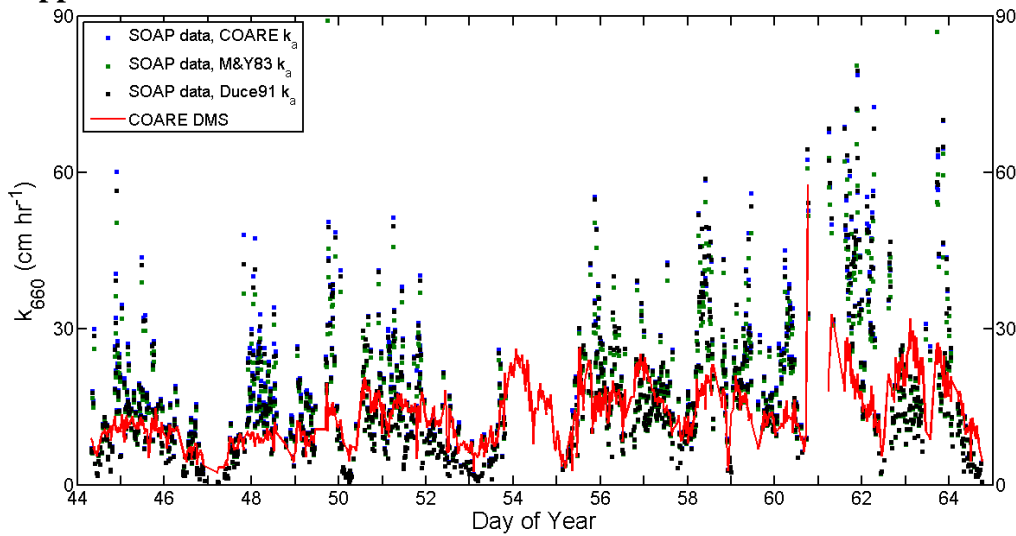

2  
3 **Figure A**

4 Time series of SOAP waterside gas transfer velocities ( $k_w$ ) normalised to Schmidt number = 660.

5 NOAA COARE model output (red line) shown for reference. Airside gas transfer velocity ( $k_a$ ) estimates

6 were used to calculate  $k_w$  from measured  $K_w$  using three different models/parameterisations:

- 7 - **COARE** (Fairall, C. W. et al. Implementation of the Coupled Ocean-Atmosphere Response Experiment flux algorithm with
- 8  $\text{CO}_2$ , dimethyl sulfide, and  $\text{O}_3$ , J. Geophys. Res.-Oceans, 116, C00F09, 10.1029/2010jc006884, 2011.).
- 9 - **M&Y83** (Mackay, D., and Yeun, A. T. K.: Mass transfer coefficient correlations for volatilization of organic solutes from
- 10 water, Environ. Sci. Technol., 17, 4, 211-217, Doi 10.1021/Es00110a006, 1983).
- 11 - **Duce91** (Duce, R. A., et al. The atmospheric input of trace species to the world ocean, Global Biogeochemical Cycles, 5, 3,
- 12 193-259, 1991.).

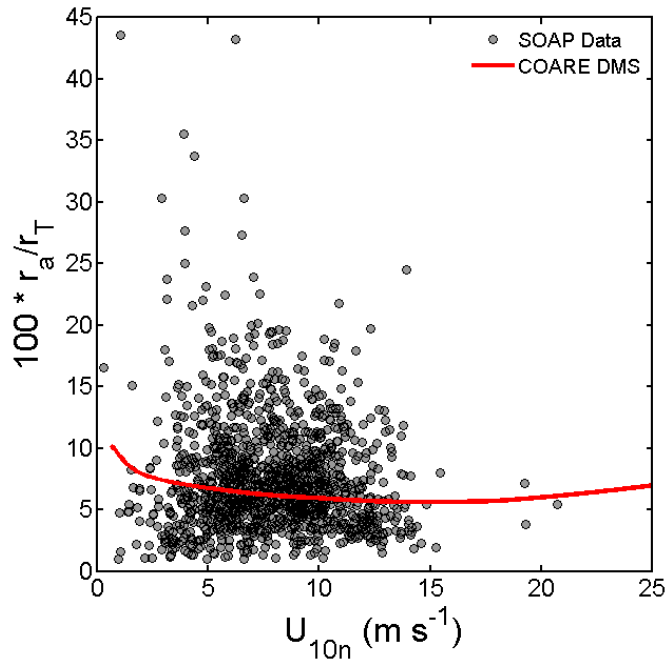

14  
15 **Figure B**

16 Percentage contribution of airside resistance ( $r_a$ ) to total resistance ( $R_T = 1/K_w$ ). Grey points =  $r_a$

17 (COARE estimate) /  $R_T$  (SOAP data). Red line = NOAA COARE estimates of  $r_a$  and  $R_T$ .

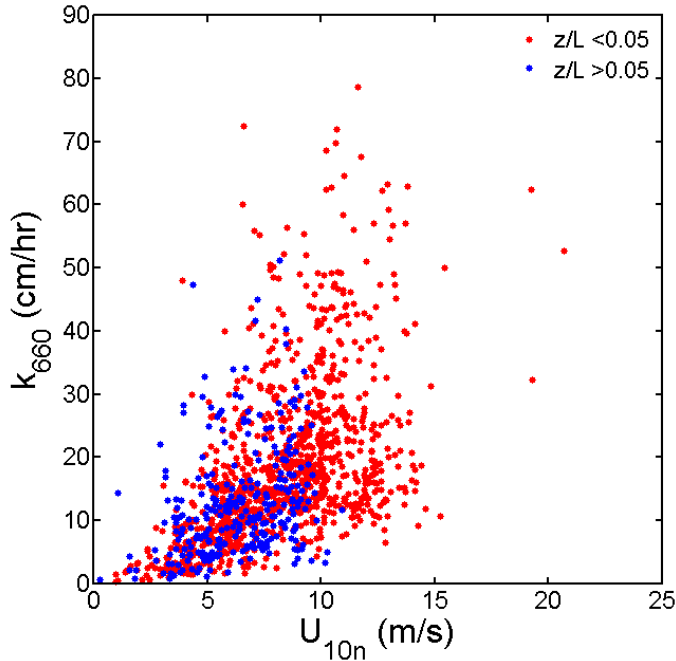

18  
 19 **Figure C**  
 20 SOAP gas transfer coefficients plotted as a function of wind speed, with symbol color used to  
 21 distinguish data above (blue) or below (red) a stability ( $z/L$ ) threshold of 0.05 (see main text).  
 22

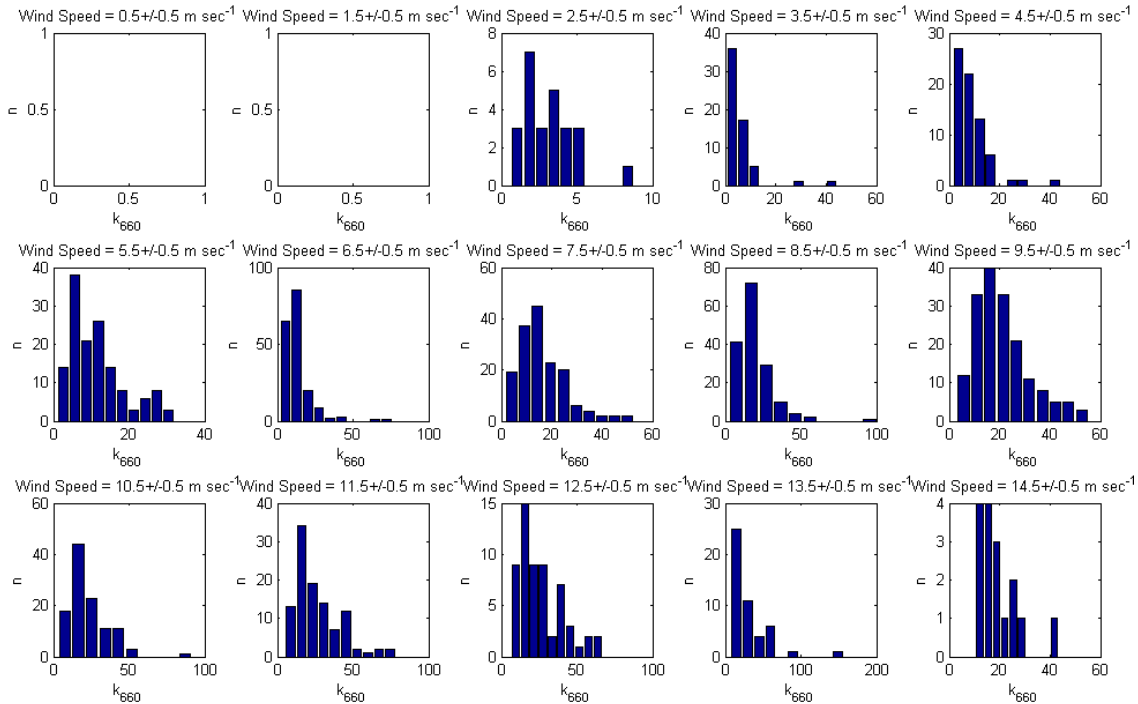

23  
 24 **Figure D**  
 25 Wind speed binned frequency distributions of  $k_{660}$  during the SOAP cruise illustrating log-normal  
 26 behavior.

27  
28  
29  
30  
31

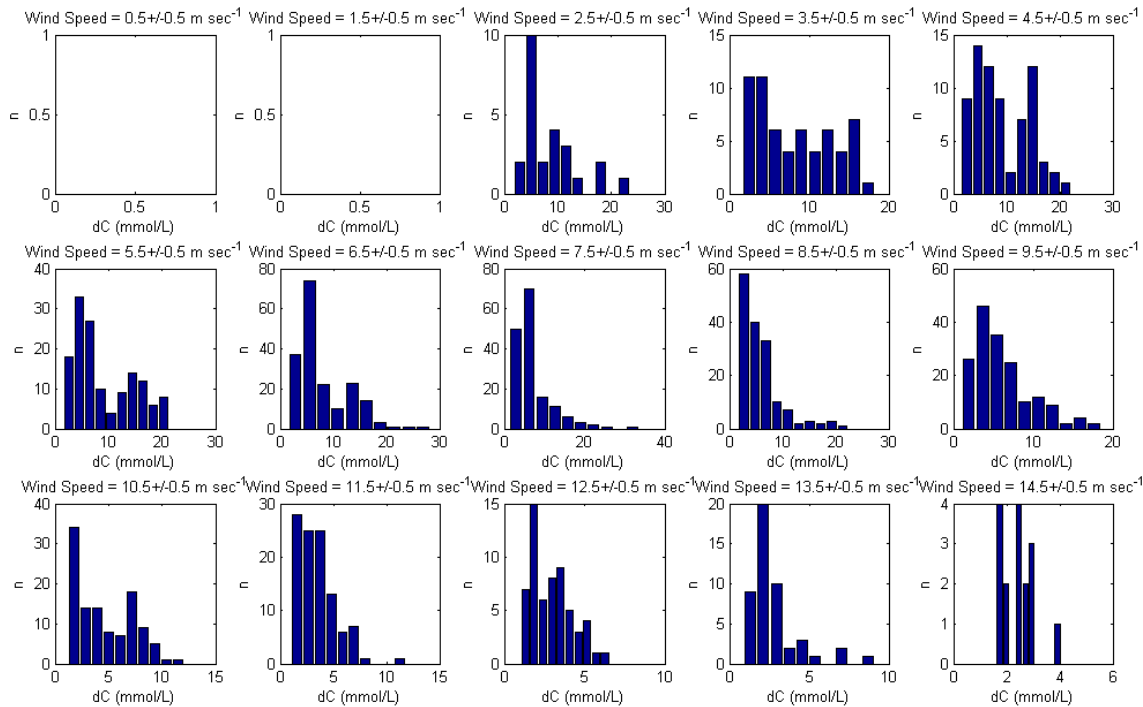

**Figure E**  
Wind speed binned frequency distributions of  $\Delta C$  during the SOAP cruise illustrating log-normal behavior.

32  
33  
34  
35

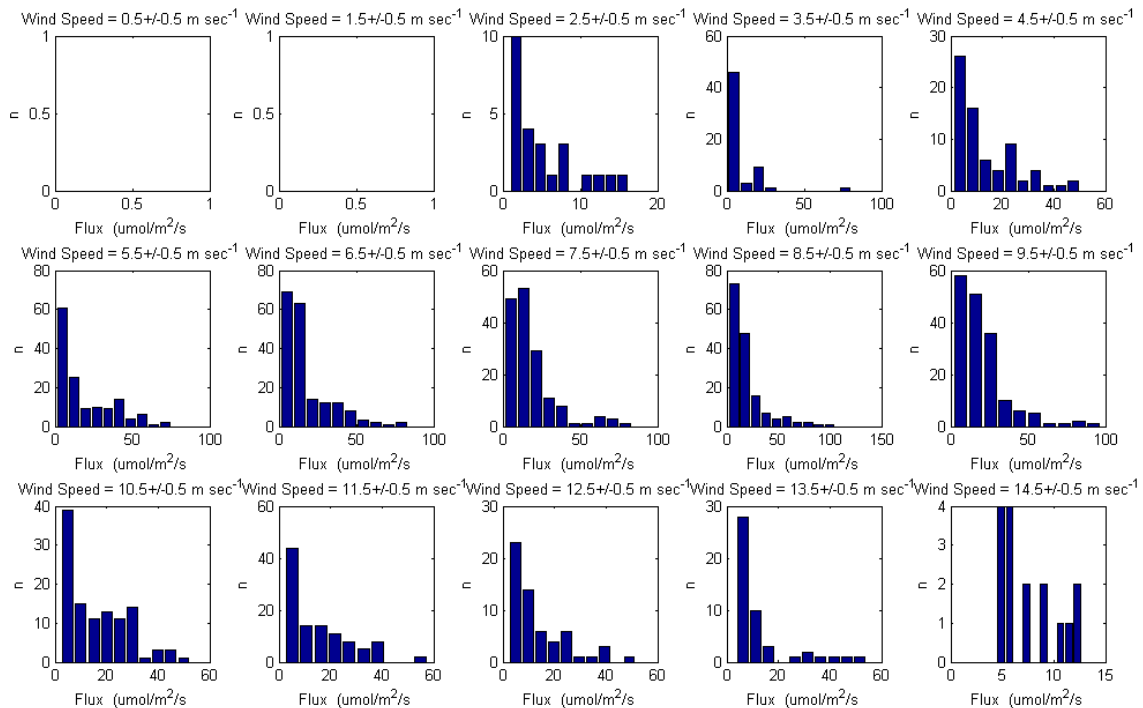

**Figure F**  
Wind speed binned frequency distributions of  $F_{DMS}$  during the SOAP cruise illustrating log-normal behavior.

36  
37  
38  
39  
40

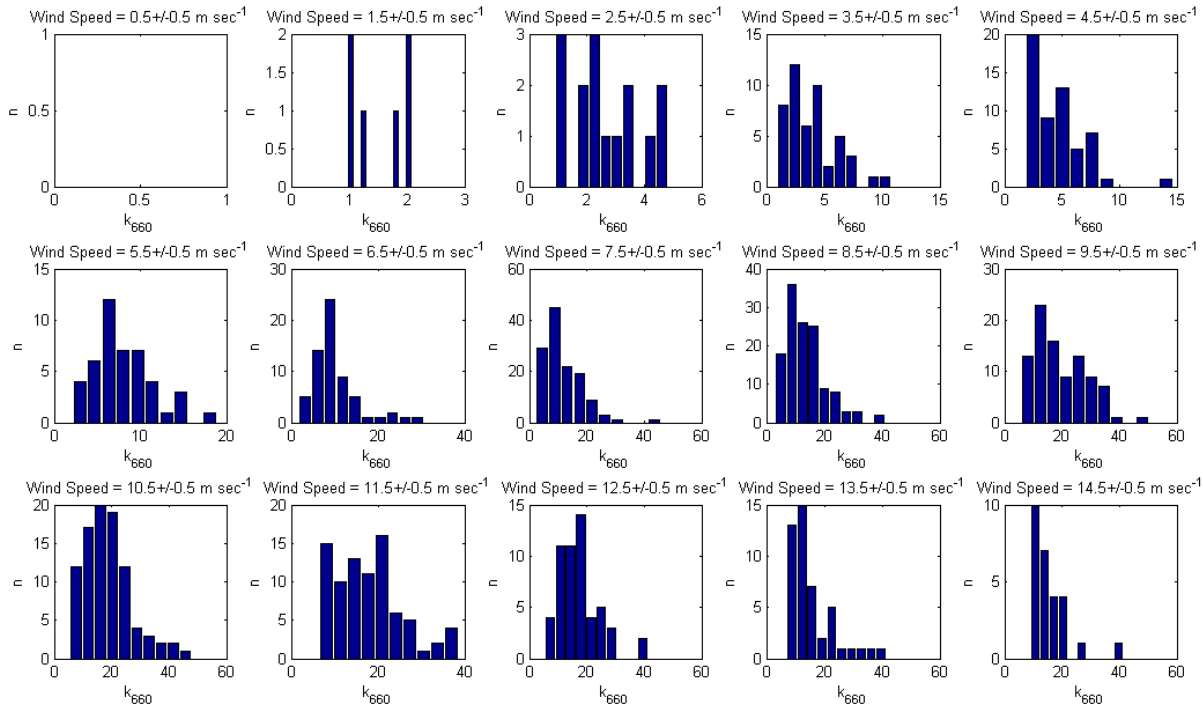

**Figure G**

Wind speed binned frequency distributions of  $k_{660}$  during the Knorr\_11 cruise illustrating log-normal behavior.

41  
42  
43  
44  
45

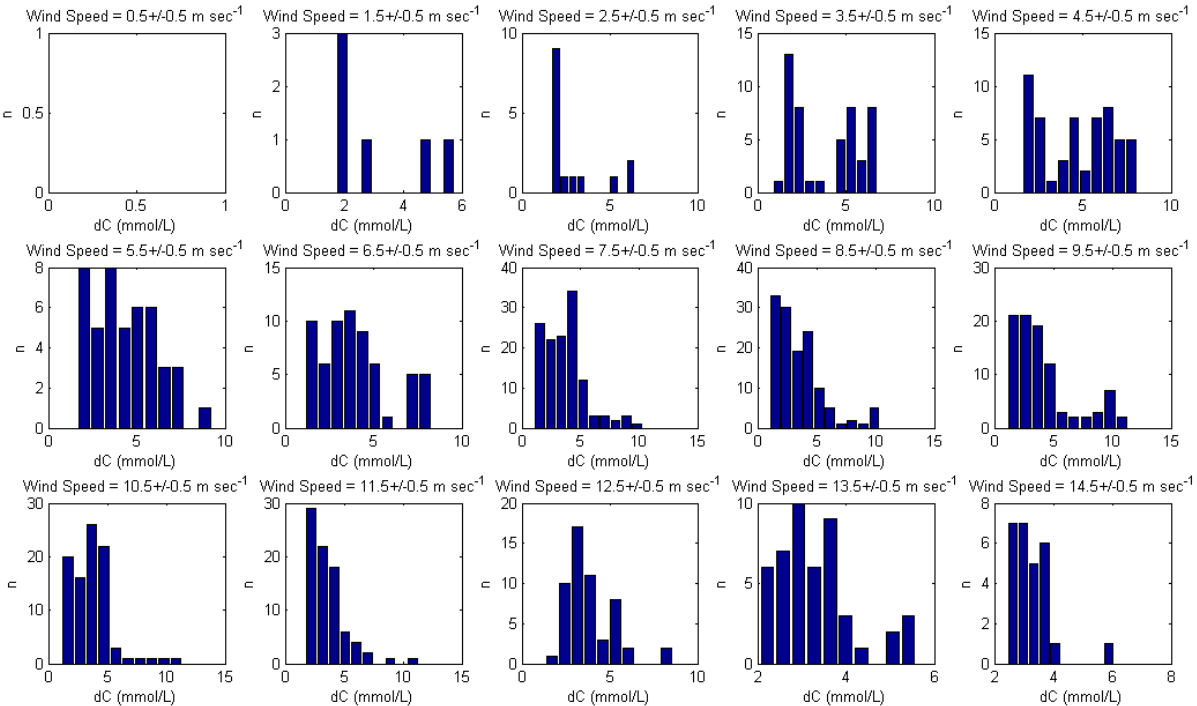

**Figure H**

Wind speed binned frequency distributions of  $\Delta C$  during the Knorr\_11 cruise illustrating log-normal behavior.

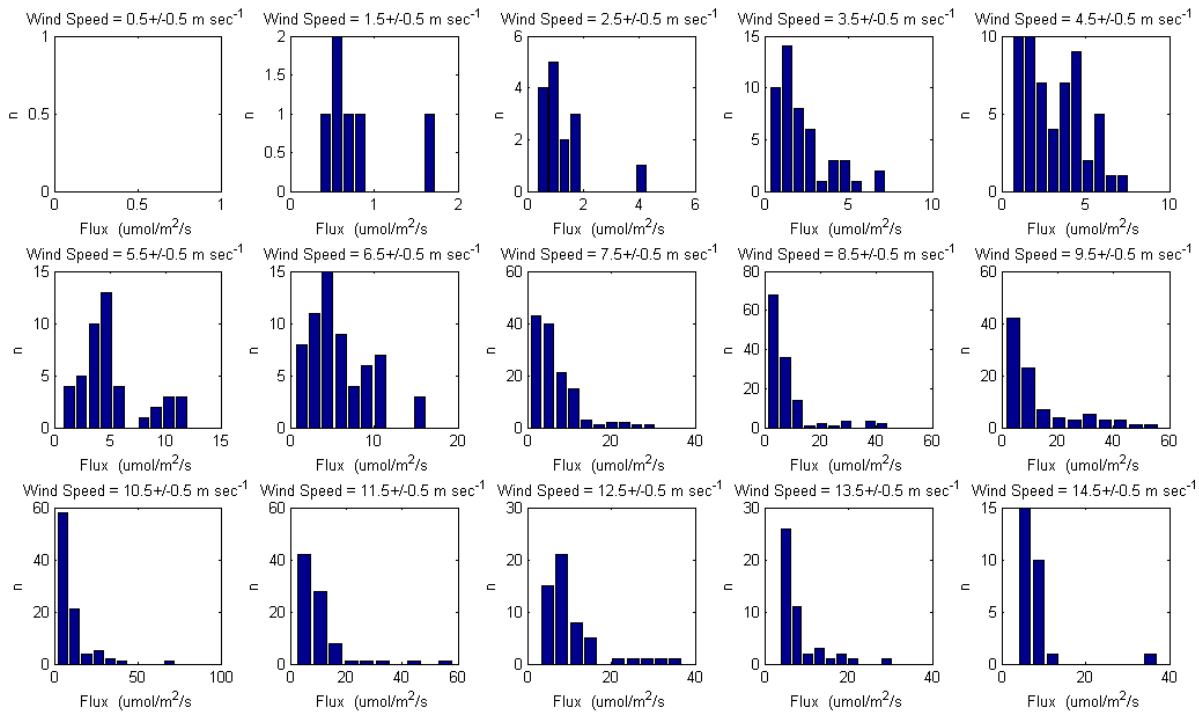

46  
47  
48  
49  
50

**Figure I**  
Wind speed binned frequency distributions of  $F_{DMS}$  during the Knorr\_11 cruise illustrating log-normal behavior.

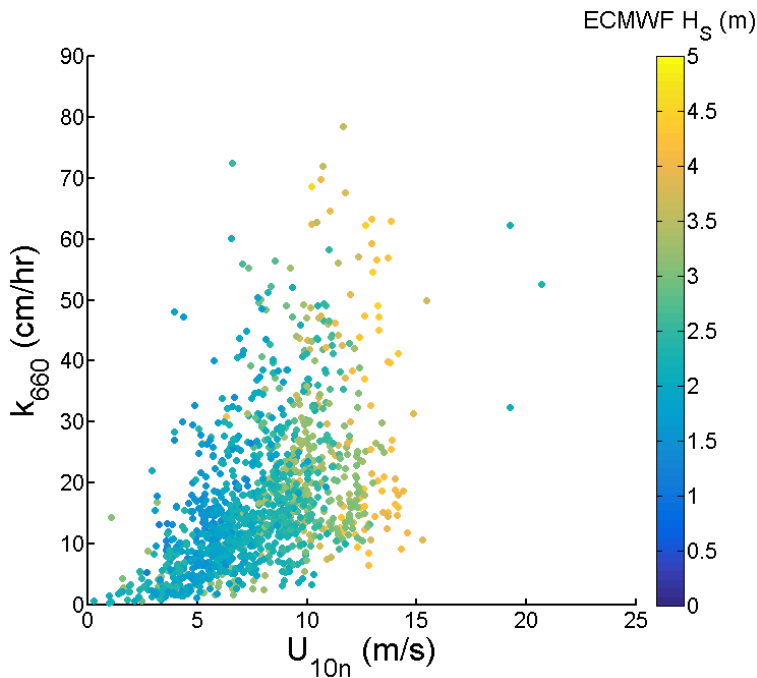

51  
52  
53  
54  
55

**Figure J**  
SOAP gas transfer coefficients plotted as a function of wind speed, with symbol color indicating ECMWF-retrieved significant wave height.

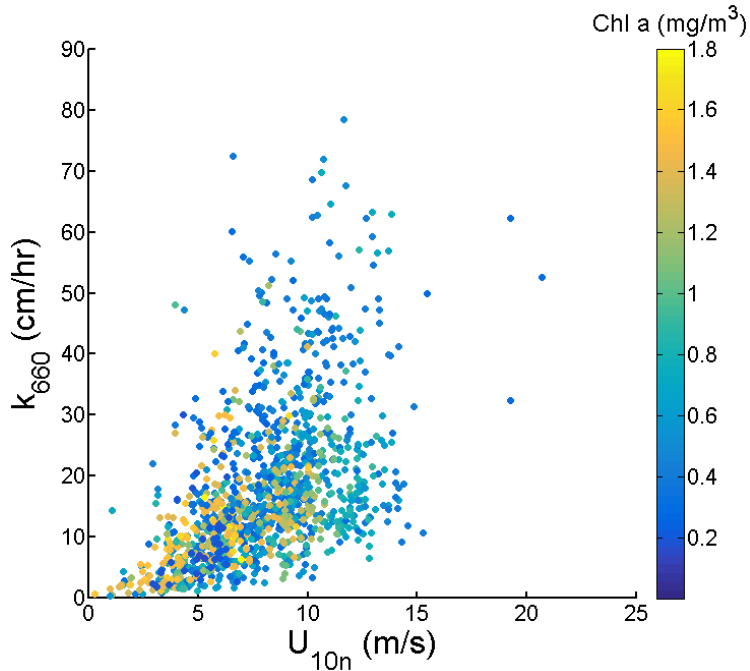

56  
 57 **Figure K**  
 58 SOAP gas transfer coefficient residuals plotted as a function of wind speed, with symbol color  
 59 indicating Chl *a*-from the ship's fluorometer.  
 60

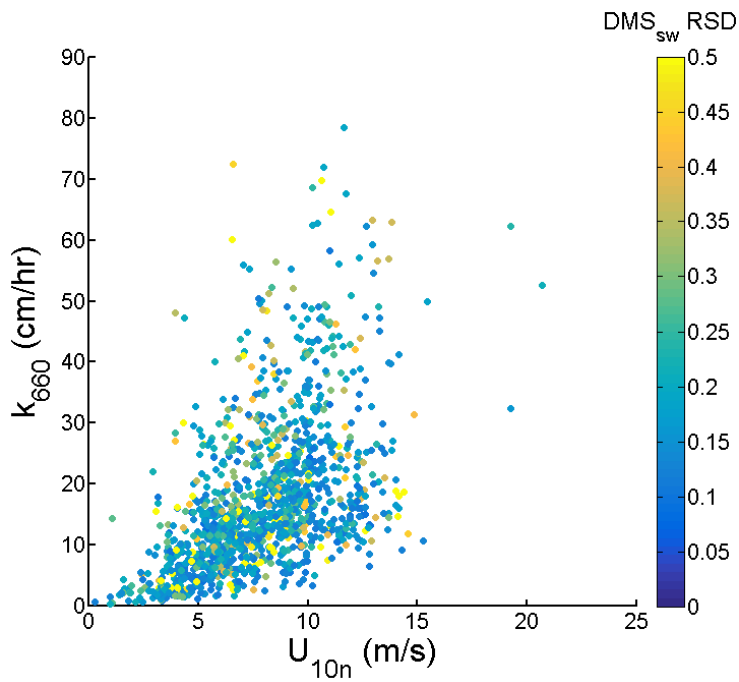

61  
 62 **Figure L**  
 63 SOAP gas transfer coefficients plotted as a function of wind speed, with symbol color indicating  $DMS_{sw}$   
 64 RSD (see main text). Colourbar axis restricted to 0.5 to highlight larger RSD values. Maximum value =  
 65 2.77.  
 66
